# Supplementary figures and images for: Nucleosome occupancy reveals regulatory elements of the CFTR promoter
Source: PubMed Central journal article supplement — Nucleic Acids Res. 2011 Sep 24;40(2):625–37. doi: 10.1093/nar/gkr754 (PMC3258145; doi:10.1093/nar/gkr754), 2011-09-24

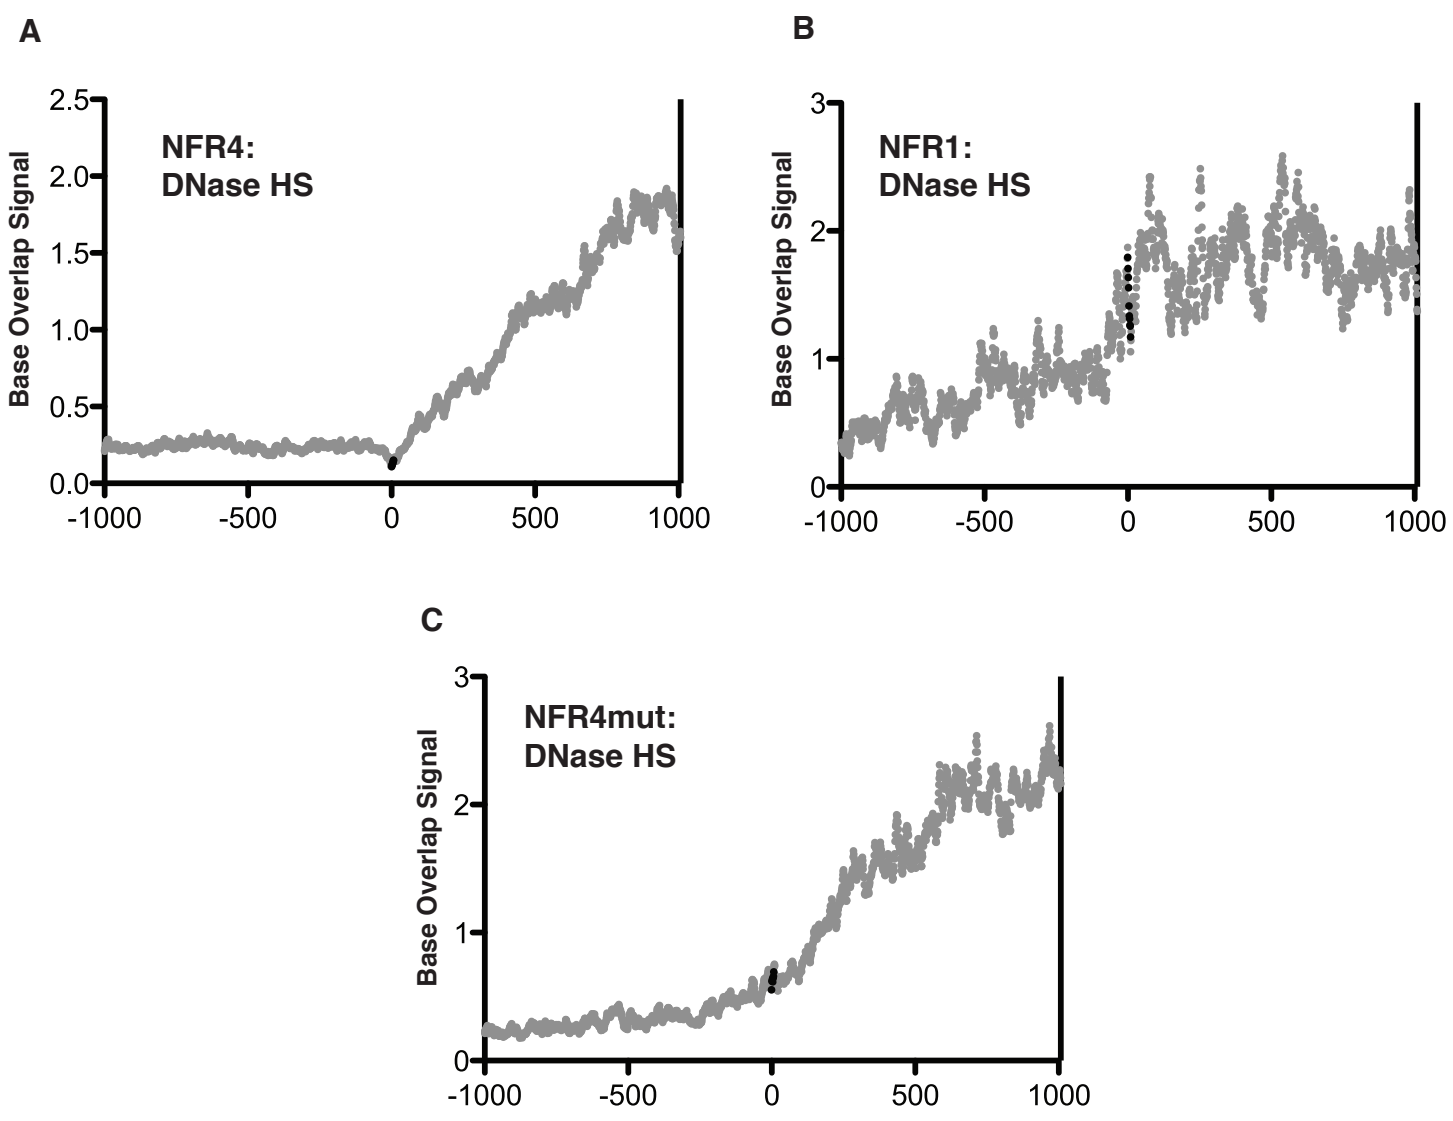

Supplementary Figure 3

Supplement: supp_gkr754_nar-01490-x-2011-File012.pdf [file supp_gkr754_nar-01490-x-2011-File012.pdf]
